# Supplementary material
Source: PubMed Central journal article supplement (PMC2742309)

Supplementary material for the article “Enduring Effects of a Computer-Assisted  
Training Program for Cognitive Behavioral Therapy:  
A six-month follow-up of CBT4CBT” published in  
*Drug and Alcohol Dependence*

Kathleen M. Carroll, Samuel A. Ball, Steve Martino,  
Charla Nich, Theresa A. Babuscio, Bruce J. Rounsaville

Yale University School of Medicine  
Division of Substance Abuse  
West Haven, CT 06516 USA

This material supplements but does not replace the content of the peer-reviewed  
paper published in *Drug and Alcohol Dependence*

Corresponding author:  
Kathleen M Carroll PhD  
Division of Substance Abuse  
Yale University School of Medicine  
950 Campbell Avenue, 151D  
West Haven, CT 06516  
Kathleen.carroll@yale.edu

CONSORT diagram

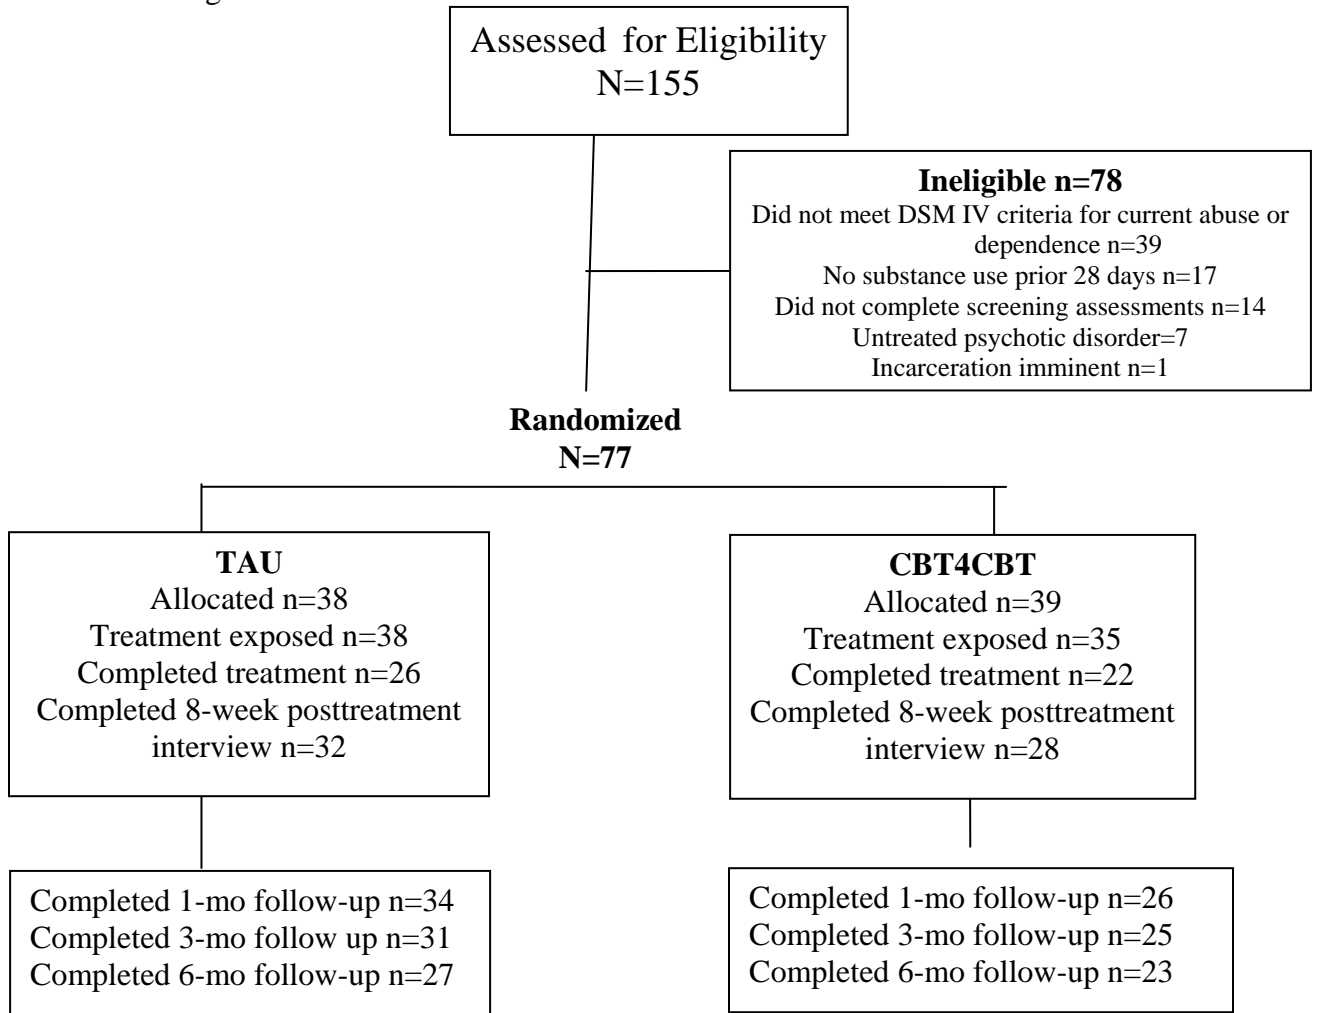

Supplement: NIHMS93825-supplement-01.pdf [file NIHMS93825-supplement-01.pdf]
